# Supplementary material
Source: publisher figshare collection journal article supplement (https://acs.figshare.com/ndownloader/files/3899416)
Supplement: Supplementary file 1 [file 3899416]

## Supporting information

### 4,4',5,5'-Tetracarboxy-2,2'-Bipyridine Ru(II) Sensitizers for Dye-Sensitized Solar Cells

Chun-Cheng Chou,<sup>a</sup> Fa-Chun Hu,<sup>a</sup> Kuan-Lin Wu,<sup>a</sup> Tainan Duan,<sup>a</sup> Yun Chi,<sup>\*,a</sup> Shih-Hung Liu,<sup>b</sup> Gene-Hsiang Lee,<sup>b</sup> Pi-Tai Chou<sup>\*,b</sup>

<sup>a</sup> Department of Chemistry and Low Carbon Energy Research Center, National Tsing Hua University, Hsinchu 30013, Taiwan; E-mail: [ychi@mx.nthu.edu.tw](mailto:ychi@mx.nthu.edu.tw)

<sup>b</sup> Department of Chemistry and Center for Emerging Material and Advanced Devices, National Taiwan University, Taipei 10617, Taiwan; E-mail: [chop@ntu.edu.tw](mailto:chop@ntu.edu.tw)

#### Experimental section

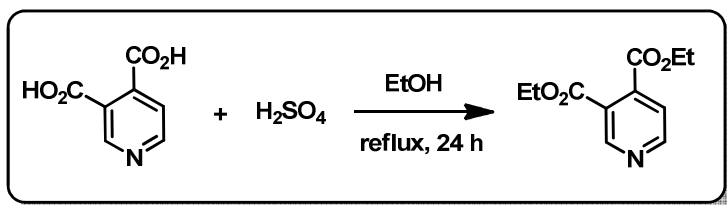

#### Synthesis of 3,4-di-ethoxycarbonyl pyridine:

The ethanol solution of cinchomeronic acid (10.0 g, 59.8 mmol) was added concentrate  $\text{H}_2\text{SO}_4$  (12 mL) slowly, and the mixture was heated to reflux for 2 days. After cooling the reaction mixture to RT, excess of  $\text{EtOH}$  was first stripped off. After then, the oily mixture was dissolved in ethyl acetate, neutralized with  $\text{NH}_4\text{OH}_{(\text{aq})}$ , dried over  $\text{Na}_2\text{SO}_4$  and concentrated. Finally, the product was purified by silica gel column chromatography (ethyl acetate : hexane = 1 : 3). Yield: 9.0 g, 67%.

**Selected spectral data:**  $^1\text{H}$  NMR (400 MHz,  $\text{CDCl}_3$ , 298 K):  $\delta$  9.04 (s, 1H), 8.79 (d,  $J_{\text{HH}} = 5.2$  Hz, 1H), 7.47 (d,  $J_{\text{HH}} = 5.2$  Hz, 1H), 4.41 ~ 4.35 (m, 4H), 1.38 ~ 1.34 (m, 6H).

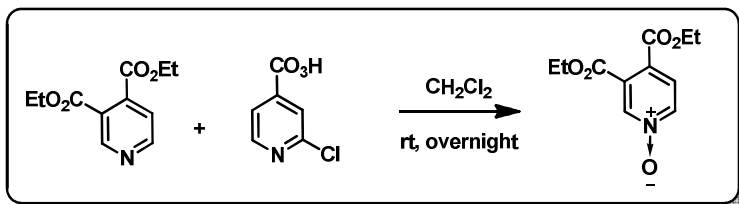

#### Synthesis of 3,4-di-ethoxycarbonyl-pyridine 1-oxide:

$\text{mCPBA}$  (11.0 g, 63.7 mmol) was dissolved in  $\text{CH}_2\text{Cl}_2$  (100 mL) and slowly added into the  $\text{CH}_2\text{Cl}_2$  solution (150 mL) of 3,4-di-ethoxycarbonyl pyridine (9.0 g, 40.3

mmol). The mixture was stirred at room temperature overnight, the resultant solution was quenched by  $\text{Na}_2\text{CO}_{3(\text{aq})}$ , thoroughly washed with deionized water and dried over anhydrous  $\text{Na}_2\text{SO}_4$ . Finally, the organic layer was concentrated using a rotary evaporator, and the residue was used for subsequent reaction without purification. Yield: 8.9 g, 92.3%.

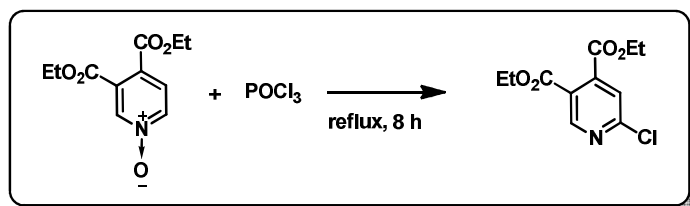

#### Synthesis of 6-chloro-3,4-di-ethoxycarbonyl pyridine:

3,4-di-ethoxycarbonyl-pyridine 1-oxide (9.2 g, 38.5 mmol) was dissolved in  $\text{POCl}_3$  (110 mL) and was heated to reflux overnight. The  $\text{POCl}_3$  was removed under vacuum, and the residue was dissolved in  $\text{CH}_2\text{Cl}_2$ , washed with  $\text{Na}_2\text{CO}_{3(\text{aq})}$ , and dried over anhydrous  $\text{Na}_2\text{SO}_4$ . Finally, the organic layer was concentrated using a rotary evaporator, and the crude product was purified by column chromatography on silica gel. Yield: 5.3 g, 54%.

**Selected spectral data:**  $^1\text{H}$  NMR (400 MHz,  $\text{CDCl}_3$ , 298 K):  $\delta$  8.83 (s, 1H), 7.48 (s, 1H), 4.40 ~ 4.36 (m, 4H), 1.38 ~ 1.34 (m, 6H).

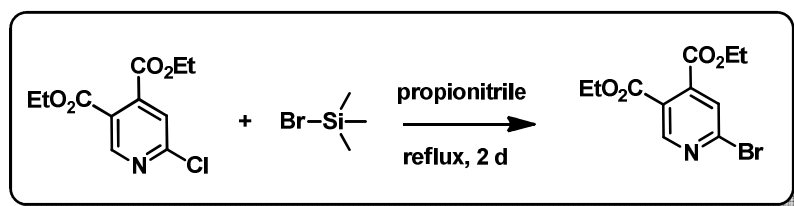

#### Synthesis of 6-bromo-3,4-di-ethoxycarbonyl-pyridine:

6-Chloro-3,4-di-ethoxycarbonyl pyridine (5 g, 19.4 mmol) was dissolved in propionitrile (60 mL), and bromotrimethylsilane (17.8 g, 116.4 mmol) was slowly added. The mixture was heated to reflux for 2 days, followed by removal of solvent under vacuum. Subsequently, the residue was dissolved in  $\text{CH}_2\text{Cl}_2$  and the solution was washed with  $\text{Na}_2\text{CO}_{3(\text{aq})}$ , dried over anhydrous  $\text{Na}_2\text{SO}_4$ , and concentrated using a rotary evaporator. Finally, the residue was purified by silica gel column chromatography (ethyl acetate : hexane = 1 : 5). Yield: 4.1 g, 70%.

**Selected spectral data:**  $^1\text{H}$  NMR (400 MHz,  $\text{CDCl}_3$ , 298 K):  $\delta$  8.79 (s, 1H), 7.64 (s, 1H), 4.42 ~ 4.35 (m, 4H), 1.38 ~ 1.35 (m, 6H).

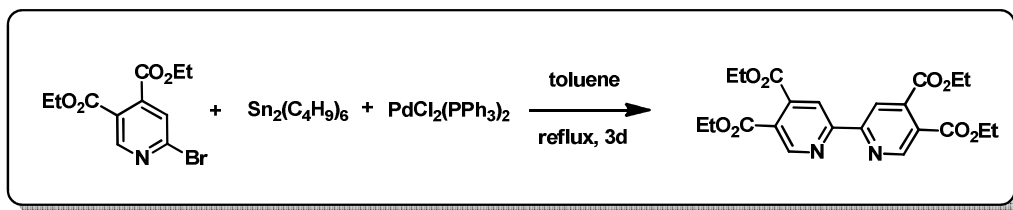

### Synthesis of 4,4',5,5'-tetra-ethoxycarbonyl-2,2'-bipyridine:

A toluene solution (30 mL) of 6-bromo-3,4-diethoxycarbonyl pyridine (2.0 g, 6.6 mmol),  $\text{Sn}_2(\text{C}_4\text{H}_9)_6$  (4.22 g, 7.3 mmol), and  $\text{PdCl}_2(\text{PPh}_3)_2$  (0.23 g, 0.3 mmol) was refluxed for 3 days. After cooling the solution to RT, toluene was removed under vacuum, and the residue was purified by silica gel column chromatography (ethyl acetate : hexane = 1 : 3). Yield: 0.65 g, 44%.

**Selected spectral data:** MS (EI):  $m/z$  444.1 ( $\text{M}$ )<sup>+</sup>. <sup>1</sup>H NMR (400 MHz,  $\text{CDCl}_3$ , 298 K):  $\delta$  9.12 (s, 2H), 8.65 (s, 2H), 4.46 ~ 4.39 (m, 8H), 1.42 ~ 1.37 (m, 12H).

### Computational Method

All calculations were performed by Gaussian 09 program.<sup>S1</sup> The ground state structures of TCR-1 and TCR-2 were first optimized with density functional theory (DFT) at B3LYP/LANL2DZ (Ru) and 6-31G\* (H, C, N, O, F, S) level. The optimized structures were then used to calculate 60 lowest singlet energy optical excitations using the time-dependent density functional theory (TDDFT) method. Their lowest ground triplet state energies were also calculated. To mimic the solution environment a polarizable continuum model (PCM) in Gaussian 09 was applied using dimethylformamide (DMF) as the solvent.

In order to investigate the behavior of the Ru(II) dyes adsorbing onto the  $\text{TiO}_2$  surface, we also simulated TFRS-2, TFRS-52, TCR-1 and TCR-2 anchoring onto the anatase (101)  $\text{TiO}_2$  surface. We have reported the computation of black dye (N749) anchoring onto the  $(\text{TiO}_2)_{28}$  surface<sup>S2</sup>. In this study, we then extended to a larger surface using  $(\text{TiO}_2)_{38}$  nanocluster as the simulation model. The surface area of  $(\text{TiO}_2)_{38}$  was suitable for both the dicarboxy groups to anchor onto. In this approach the ground state structures of TFRS-2/ $(\text{TiO}_2)_{38}$ , TFRS-52/ $(\text{TiO}_2)_{38}$ , TCR-1/ $(\text{TiO}_2)_{38}$  and TCR-2/ $(\text{TiO}_2)_{38}$  were optimized at B3LYP/LANL2DZ (Ti, Ru) and 6-31G\* (H, C, N, O, F, S) level and DMF was used as the solvent.

### Photovoltaic characterization

Photovoltaic performances were recorded under a class-AAA solar simulator (Model 11016A, Sun 3000, ABET Technologies) equipped with a 550 W xenon light source and water-cooling stage (25 °C). The output power density (100  $\text{mW}/\text{cm}^2$ ) was calibrated using a certificated KG-3 Si reference cell and with a circular aperture of 8

mm. The current-voltage characteristic was obtained with a 4-wire setup, with delay time of 100 ms and bias scan mode switching from short-circuit to open-circuit using a Keithley digital source meter (Model 2400). The incident photon-to-current conversion efficiency (IPCE) was calculated with the equation  $1240 \cdot J_{sc}(\lambda) / (\lambda \cdot P_{in}(\lambda))$ , where  $J_{sc}$  is the short-circuit current density under monochromatic illumination in unit of  $A/cm^2$ ,  $\lambda$  is the wavelength of incident monochromatic light in unit of nanometer, and  $P_{in}$  is the monochromatic light intensity in unit of  $W/cm^2$ , and were plotted as a function of incident wavelength with an increment of 10 nm. The current was pre-amplified by a current amplifier (SR570) and measured using a Keithley 2400 source meter. It should be noted that 10 values of  $J_{sc}$  (in interval of 50 ms) were collected sequentially after illuminating the device for 3 seconds and then averaged for calculation of IPCE. A 300 W Xe lamp (Model 6258, Newport Oriel) combined with an Oriel cornerstone 260 1/4 m monochromator (Model 74100) provided the monochromatic beam (dc mode). The beam power intensity was calibrated with a power meter (Model 1936-C, Newport) equipped with a Newport 818-UV photodetector.

### Electrochemical study

Cyclic voltammetry was measured using an electrochemical analyzer (CH Instrument) and a single-compartment, three-electrode cell with a Pt wire counter electrode. The studied sensitizers were dissolved in mixed DMSO and ethanol, and adsorbed on a transparent  $TiO_2$  film (*ca.* 7  $\mu m$ ) which served as the working electrode, while Ag/AgCl electrode and 0.1 M of TBAPF<sub>6</sub> (TBA =  $NBu_4^+$ ) in acetonitrile were employed as the reference electrode and supporting electrolyte, respectively. The obtained data was calibrated with  $Fc/Fc^+$  reference and then converted to value relative to NHE by addition of 0.63 V.<sup>S3</sup>

### Charge extraction and intensity-modulated photovoltage spectroscopy

Charge extraction (CE) was measured with the PGSTAT302N electrochemical workstation (Autolab) at an open-circuit condition for the photovoltage of the device to attain a steady state; the red light-emitting diode (LED, 627 nm) was then terminated while the device simultaneously switched to a short-circuit condition to measure the excess charges generated in the film.<sup>S4,5</sup> Intensity-modulated photovoltage spectroscopy (IMVS) measurement was conducted using the same PGSTAT302N electrochemical workstation equipped with a frequency response analyzer (FRA) to drive a red light emitting diode. The analysis of the photovoltage response of the cells was conducted in the frequency range of  $10^4 - 1$  Hz and LED supplied the AC (modulation depth 10%) perturbation current superimposed on the

DC current.

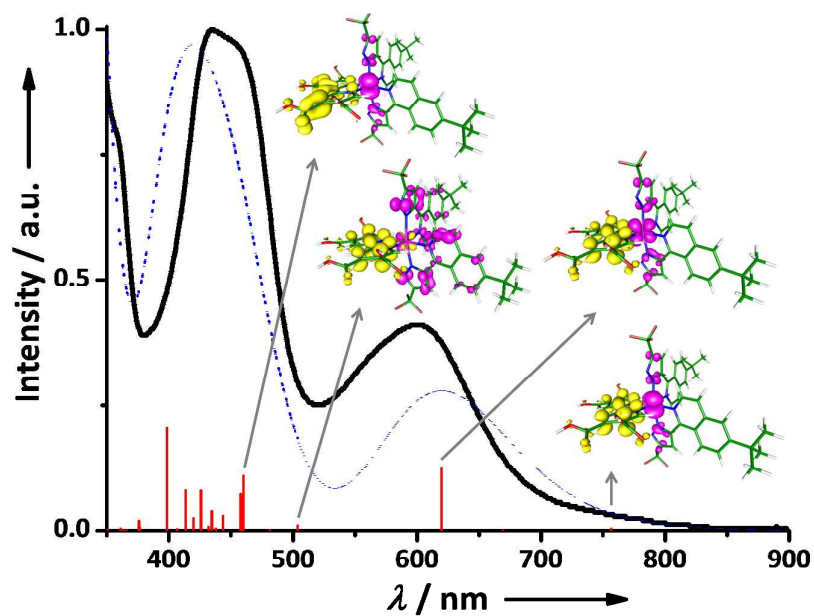

**Figure S1.** Experimental (black line) and TDDFT calculated (blue dashed line obtained with a Gaussian convolution  $\sigma = 0.2$  eV) absorption spectra of TCR-2 in DMF. Also depicted are the TDDFT calculated absorption wavelengths (red vertical lines) and the relative transition probability (magnitude of vertical lines). Selected frontier orbitals (pink: occupied orbital, yellow: unoccupied orbital) that contribute to the major transitions are also shown.

**Table S1.** The wavelengths, transition probabilities and charge transfer character of the optical transitions over 300 nm in selected states with oscillator strength > 0.03 for **TCR-1** in DMF. The lowest triplet optical transition ( $S_0 \rightarrow T_1$ ) is also listed.

| State    | $\lambda_{cal}$ (nm) | $f$    | Assignments                                                                                                                                                              | MLCT   |
|----------|----------------------|--------|--------------------------------------------------------------------------------------------------------------------------------------------------------------------------|--------|
| $T_1$    | 857.2                | 0      | HOMO-1 $\rightarrow$ LUMO(92%)                                                                                                                                           | 42.93% |
| $S_1$    | 759.7                | 0.0039 | HOMO $\rightarrow$ LUMO(97%)                                                                                                                                             | 56.45% |
| $S_3$    | 606.8                | 0.1307 | HOMO-1 $\rightarrow$ LUMO(90%) HOMO $\rightarrow$ LUMO+1(6%)                                                                                                             | 45.86% |
| $S_6$    | 458.4                | 0.1577 | HOMO $\rightarrow$ LUMO+1(63%) HOMO-5 $\rightarrow$ LUMO(8%)<br>HOMO-4 $\rightarrow$ LUMO(7%)                                                                            | 39.91% |
| $S_8$    | 452.9                | 0.03   | HOMO-2 $\rightarrow$ LUMO+1(59%) HOMO-1 $\rightarrow$ LUMO+1(18%)<br>HOMO-3 $\rightarrow$ LUMO(11%)                                                                      | 38.94% |
| $S_{14}$ | 416.7                | 0.16   | HOMO-1 $\rightarrow$ LUMO+2(83%)                                                                                                                                         | 44.52% |
| $S_{18}$ | 398.6                | 0.4128 | HOMO-2 $\rightarrow$ LUMO+3(86%) HOMO-2 $\rightarrow$ LUMO+2(5%)                                                                                                         | 46.77% |
| $S_{19}$ | 372.5                | 0.1555 | HOMO-2 $\rightarrow$ LUMO+4(63%) HOMO-9 $\rightarrow$ LUMO(13%)                                                                                                          | 31.35% |
| $S_{27}$ | 337.4                | 0.1361 | HOMO-5 $\rightarrow$ LUMO+2(35%) HOMO-5 $\rightarrow$ LUMO+3(18%)<br>HOMO-2 $\rightarrow$ LUMO+6(10%) HOMO-3 $\rightarrow$ LUMO+4(9%)<br>HOMO-4 $\rightarrow$ LUMO+2(8%) | 6.04%  |
| $S_{29}$ | 334                  | 0.1006 | HOMO-11 $\rightarrow$ LUMO(19%) HOMO-4 $\rightarrow$ LUMO+3(17%)<br>HOMO-3 $\rightarrow$ LUMO+3(14%) HOMO $\rightarrow$ LUMO+5(12%)<br>HOMO-4 $\rightarrow$ LUMO+2(12%)  | 7.61%  |
| $S_{41}$ | 323.3                | 0.1079 | HOMO-1 $\rightarrow$ LUMO+5(39%) HOMO-12 $\rightarrow$ LUMO(32%)<br>HOMO $\rightarrow$ LUMO+14(6%)                                                                       | 20.38% |
| $S_{42}$ | 320.2                | 0.5914 | HOMO-3 $\rightarrow$ LUMO+4(52%) HOMO-2 $\rightarrow$ LUMO+6(11%)<br>HOMO-3 $\rightarrow$ LUMO+3(8%) HOMO-4 $\rightarrow$ LUMO+4(7%)<br>HOMO-12 $\rightarrow$ LUMO(7%)   | 3.11%  |
| $S_{43}$ | 319.1                | 0.0883 | HOMO-1 $\rightarrow$ LUMO+6(36%) HOMO-3 $\rightarrow$ LUMO+3(36%)<br>HOMO-4 $\rightarrow$ LUMO+3(13%)                                                                    | 19.24% |
| $S_{44}$ | 317.6                | 0.1479 | HOMO-1 $\rightarrow$ LUMO+6(45%) HOMO-3 $\rightarrow$ LUMO+3(16%)<br>HOMO $\rightarrow$ LUMO+7(13%)                                                                      | 32.76% |
| $S_{45}$ | 316.1                | 0.1696 | HOMO-12 $\rightarrow$ LUMO(27%) HOMO-1 $\rightarrow$ LUMO+5(24%)<br>HOMO $\rightarrow$ LUMO+7(21%)                                                                       | 25.48% |
| $S_{46}$ | 315.9                | 0.1373 | HOMO $\rightarrow$ LUMO+7(42%) HOMO-1 $\rightarrow$ LUMO+5(13%)<br>HOMO-12 $\rightarrow$ LUMO(12%)                                                                       | 34.20% |
| $S_{48}$ | 312.5                | 0.0738 | HOMO-2 $\rightarrow$ LUMO+6(47%) HOMO-4 $\rightarrow$ LUMO+4(16%)<br>HOMO-5 $\rightarrow$ LUMO+3(7%) HOMO-6 $\rightarrow$ LUMO+3(6%)                                     | 26.29% |

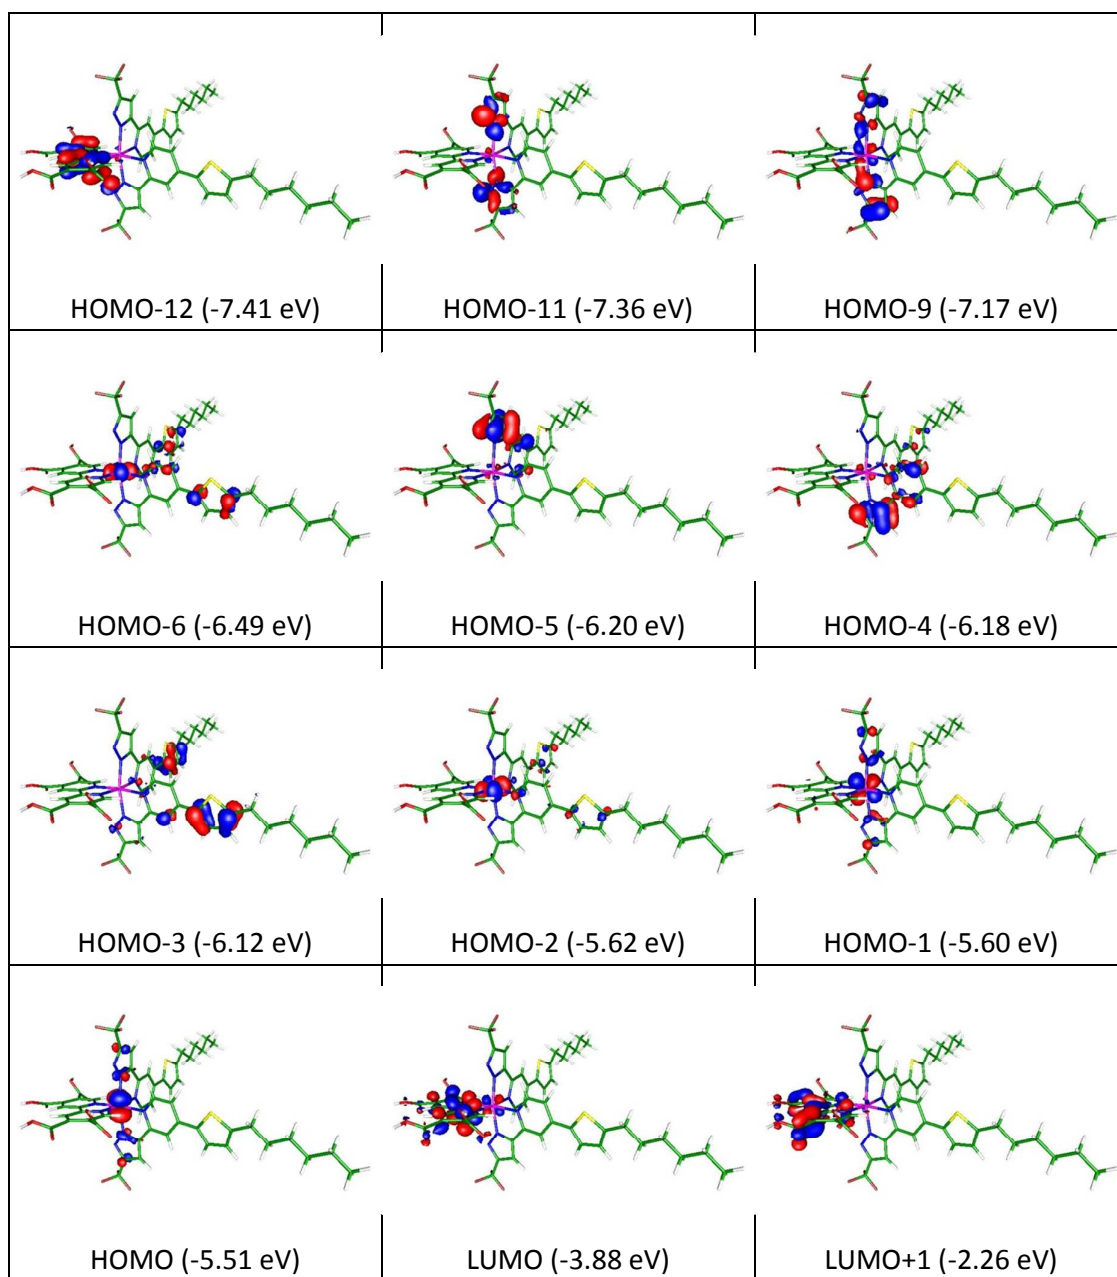

**Figure S2-1.** Frontier molecular orbitals pertinent to the optical transitions for **TCR-1**.

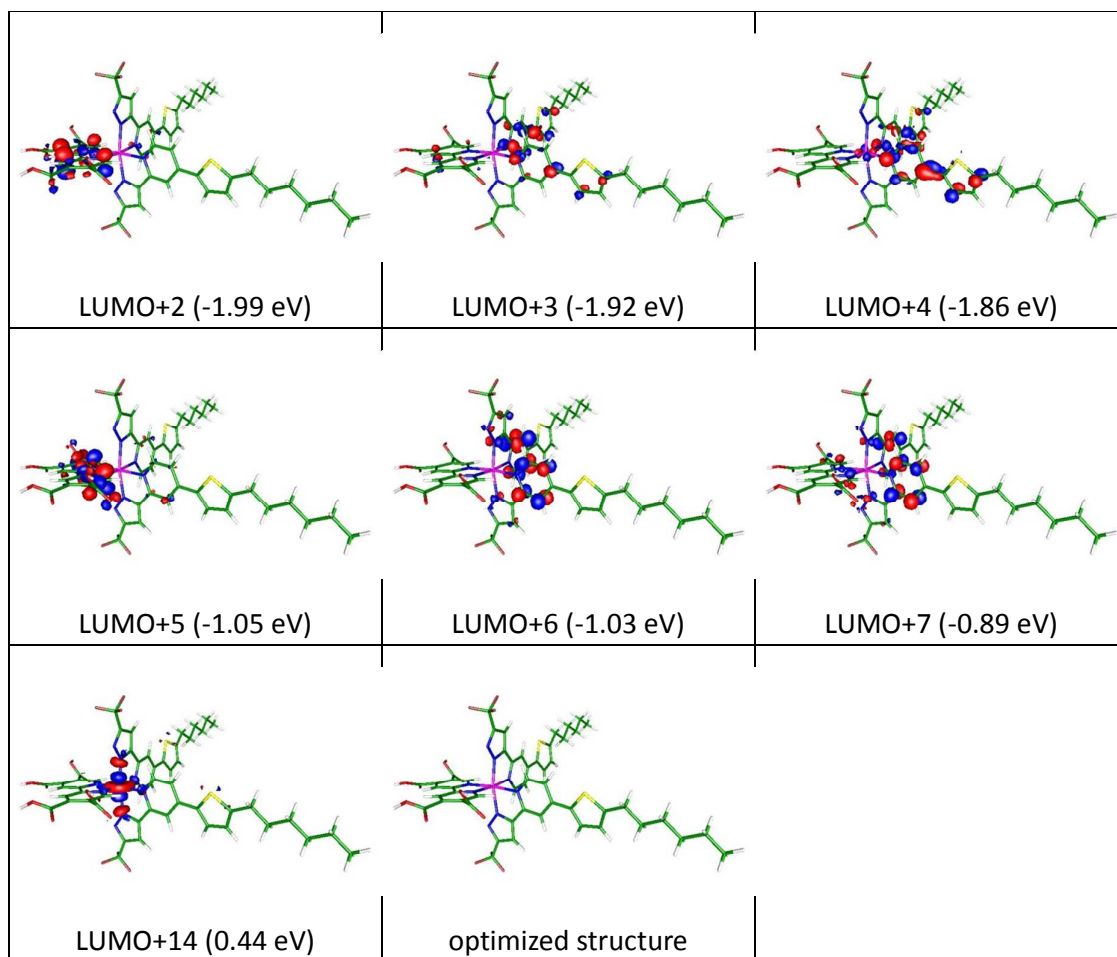

**Figure S2-2.** Frontier molecular orbitals pertinent to the optical transitions for **TCR-1**. For the clarity of viewing, the optimized structure with no involvement of frontier orbitals is shown at the last figure.



**Table S2.** The wavelengths, transition probabilities and charge transfer character of the optical transitions over 300 nm in selected states with oscillator strength > 0.01 for for **TCR-2** in DMF. The lowest triplet optical transition ( $S_0 \rightarrow T_1$ ) is also listed.

| State    | $\lambda_{cal}$ (nm) | $f$    | Assignments                                                                                                                                                                                        | MLCT   |
|----------|----------------------|--------|----------------------------------------------------------------------------------------------------------------------------------------------------------------------------------------------------|--------|
| $T_1$    | 876.2                | 0      | HOMO-1 $\rightarrow$ LUMO(92%)                                                                                                                                                                     | 39.29% |
| $S_1$    | 756.8                | 0.0033 | HOMO $\rightarrow$ LUMO(97%)                                                                                                                                                                       | 55.73% |
| $S_3$    | 619.7                | 0.1252 | HOMO-1 $\rightarrow$ LUMO(93%)                                                                                                                                                                     | 39.72% |
| $S_4$    | 503.6                | 0.01   | HOMO-3 $\rightarrow$ LUMO(93%) HOMO $\rightarrow$ LUMO+1(6%)                                                                                                                                       | 3.87%  |
| $S_6$    | 460.1                | 0.1079 | HOMO $\rightarrow$ LUMO+1(73%) HOMO-1 $\rightarrow$ LUMO+1(6%)                                                                                                                                     | 38.58% |
| $S_7$    | 457.9                | 0.0724 | HOMO-1 $\rightarrow$ LUMO+1(85%) HOMO $\rightarrow$ LUMO+1(5%)                                                                                                                                     | 44.69% |
| $S_{12}$ | 425.7                | 0.0794 | HOMO-1 $\rightarrow$ LUMO+2(60%) HOMO-1 $\rightarrow$ LUMO+3(35%)                                                                                                                                  | 46.62% |
| $S_{14}$ | 413.6                | 0.08   | HOMO-1 $\rightarrow$ LUMO+3(50%) HOMO-1 $\rightarrow$ LUMO+2(25%)<br>HOMO-2 $\rightarrow$ LUMO+4(12%)                                                                                              | 42.89% |
| $S_{16}$ | 398.2                | 0.2053 | HOMO-2 $\rightarrow$ LUMO+3(86%) HOMO-2 $\rightarrow$ LUMO+2(6%)                                                                                                                                   | 50.37% |
| $S_{25}$ | 341.5                | 0.0717 | HOMO-8 $\rightarrow$ LUMO(57%) HOMO-11 $\rightarrow$ LUMO(13%)<br>HOMO-10 $\rightarrow$ LUMO(7%)                                                                                                   | -5.02% |
| $S_{26}$ | 340.4                | 0.0526 | HOMO-3 $\rightarrow$ LUMO+4(41%) HOMO-7 $\rightarrow$ LUMO(7%)<br>HOMO-8 $\rightarrow$ LUMO(7%) HOMO $\rightarrow$ LUMO+11(6%)                                                                     | 3.54%  |
| $S_{28}$ | 337.2                | 0.0663 | HOMO-4 $\rightarrow$ LUMO+2(65%) HOMO-3 $\rightarrow$ LUMO+4(7%)<br>HOMO-2 $\rightarrow$ LUMO+11(5%)                                                                                               | 16.18% |
| $S_{29}$ | 334.8                | 0.1581 | HOMO-4 $\rightarrow$ LUMO+3(75%) HOMO-4 $\rightarrow$ LUMO+2(9%)                                                                                                                                   | 17.90% |
| $S_{30}$ | 331                  | 0.0785 | HOMO-4 $\rightarrow$ LUMO+4(72%) HOMO-11 $\rightarrow$ LUMO(7%)                                                                                                                                    | 13.47% |
| $S_{32}$ | 327.6                | 0.0405 | HOMO-1 $\rightarrow$ LUMO+5(36%) HOMO $\rightarrow$ LUMO+14(16%)<br>HOMO-11 $\rightarrow$ LUMO(8%) HOMO-4 $\rightarrow$ LUMO+4(6%)<br>HOMO-1 $\rightarrow$ LUMO+11(5%)                             | 21.58% |
| $S_{33}$ | 327.2                | 0.0429 | HOMO-10 $\rightarrow$ LUMO(33%) HOMO-8 $\rightarrow$ LUMO(15%)<br>HOMO-11 $\rightarrow$ LUMO(14%) HOMO-4 $\rightarrow$ LUMO+4(6%)<br>HOMO-1 $\rightarrow$ LUMO+5(6%) HOMO $\rightarrow$ LUMO+5(5%) | 4.39%  |
| $S_{34}$ | 322.7                | 0.1348 | HOMO $\rightarrow$ LUMO+14(22%) HOMO-1 $\rightarrow$ LUMO+5(20%)<br>HOMO-11 $\rightarrow$ LUMO(13%) HOMO-10 $\rightarrow$ LUMO(8%)<br>HOMO-1 $\rightarrow$ LUMO+11(7%)                             | 12.87% |
| $S_{37}$ | 318.7                | 0.0606 | HOMO $\rightarrow$ LUMO+6(88%)                                                                                                                                                                     | 56.87% |
| $S_{38}$ | 316.1                | 0.2708 | HOMO-1 $\rightarrow$ LUMO+5(31%) HOMO-10 $\rightarrow$ LUMO(28%)<br>HOMO-11 $\rightarrow$ LUMO(19%)                                                                                                | 14.52% |
| $S_{45}$ | 302.8                | 0.2934 | HOMO-2 $\rightarrow$ LUMO+6(79%) HOMO-1 $\rightarrow$ LUMO+7(9%)                                                                                                                                   | 48.77% |

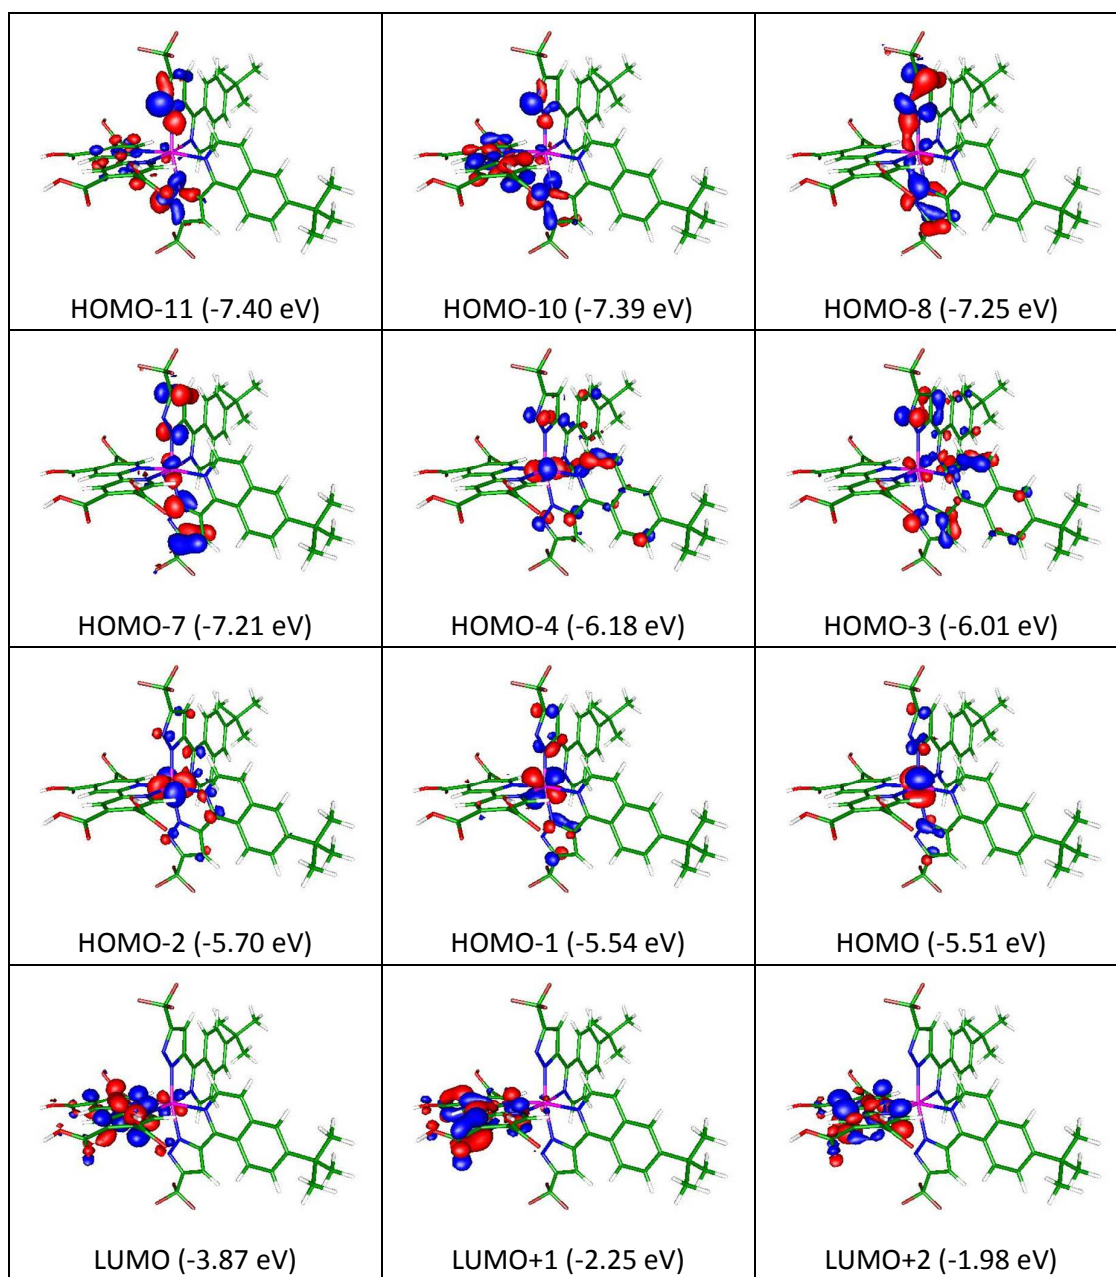

**Figure S3-1.** Frontier molecular orbitals pertinent to the optical transitions for **TCR-2**.

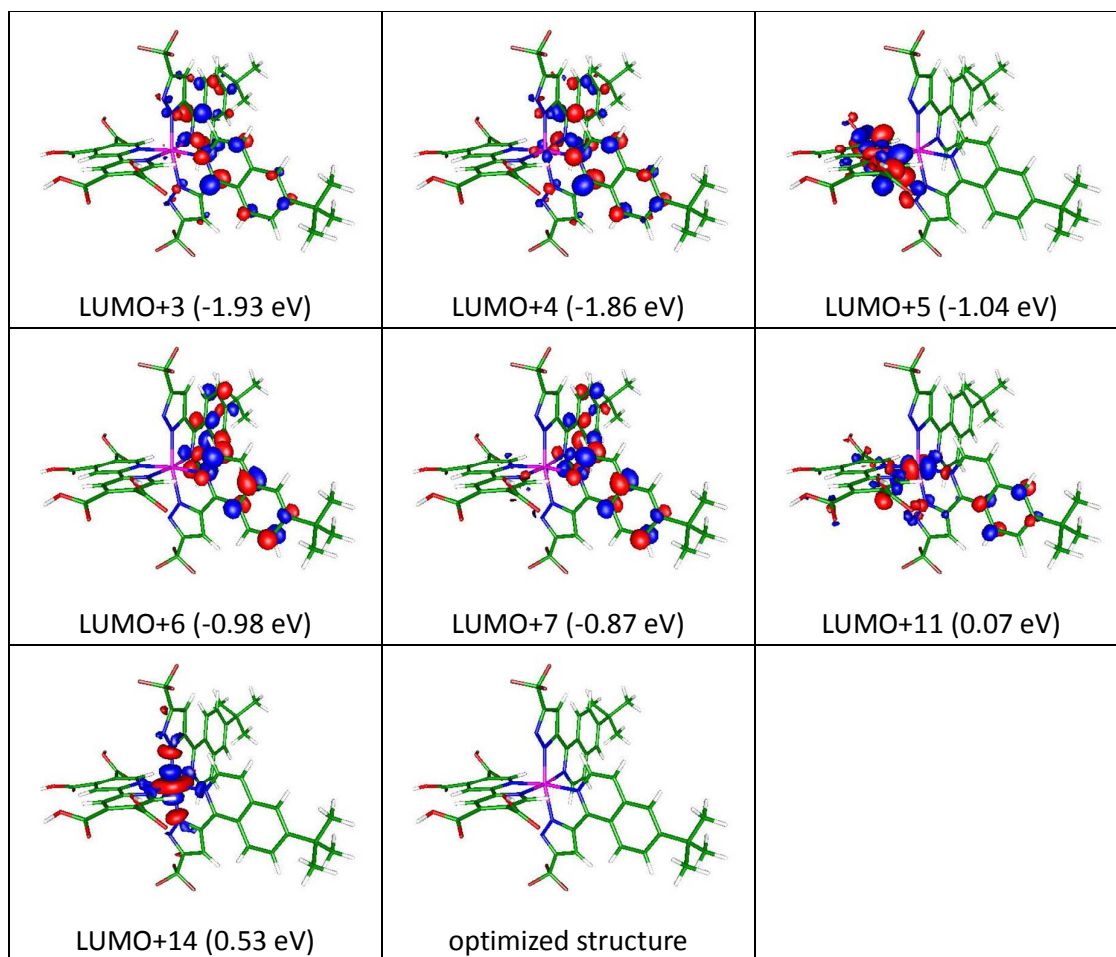

**Figure S3-2.** Frontier molecular orbitals pertinent to the optical transitions for **TCR-2**. For the clarity of viewing, the optimized structure with no involvement of frontier orbitals is shown at the last figure.

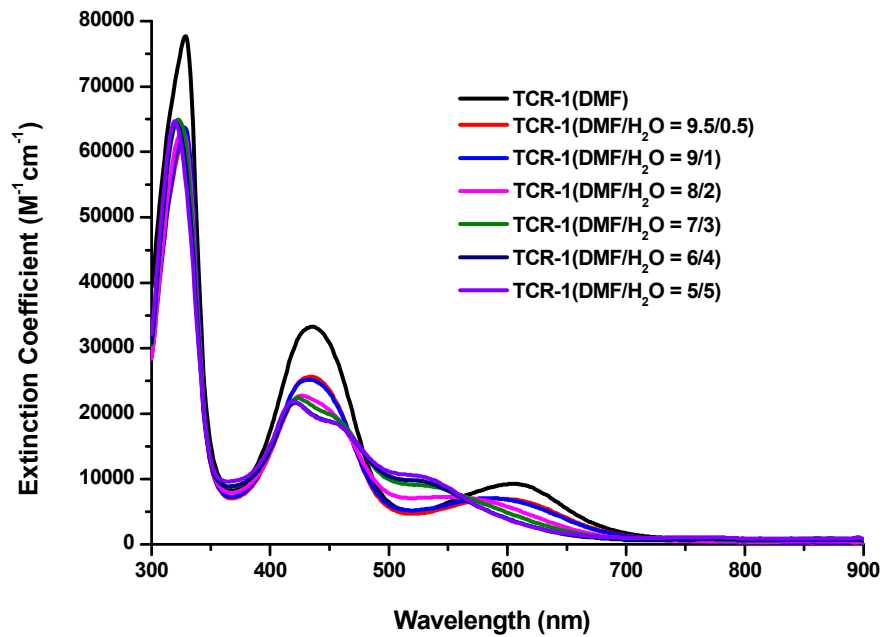

**Figure S4.** UV-Vis absorption spectra of Ru(II) sensitizers at  $1 \times 10^{-5}$  M in DMF and in mixed solvent with various H<sub>2</sub>O content.

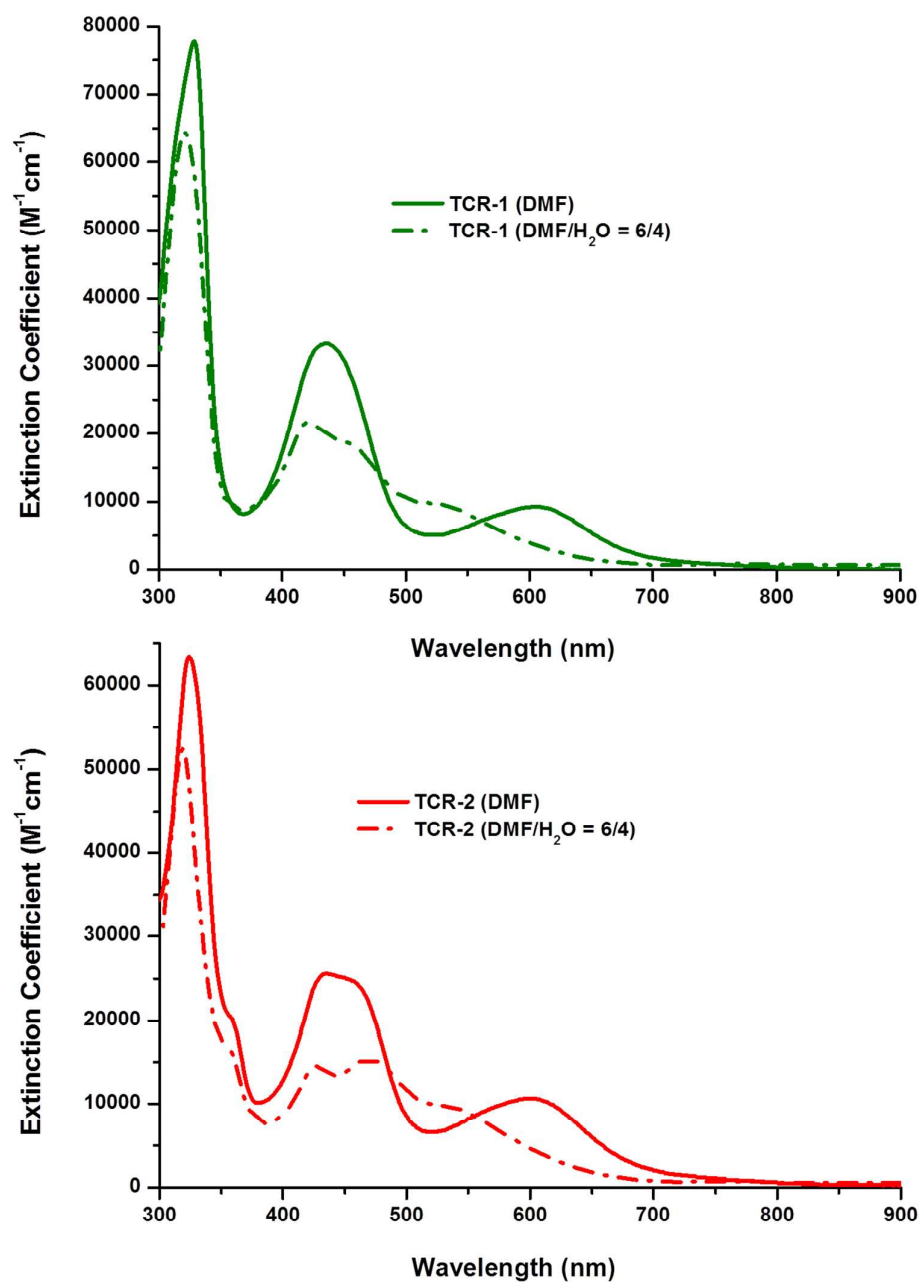

**Figure S5.** UV-Vis absorption spectra of Ru(II) sensitizers at  $1 \times 10^{-5}$  M in DMF and in mixed solvent (DMF/H<sub>2</sub>O=6/4).

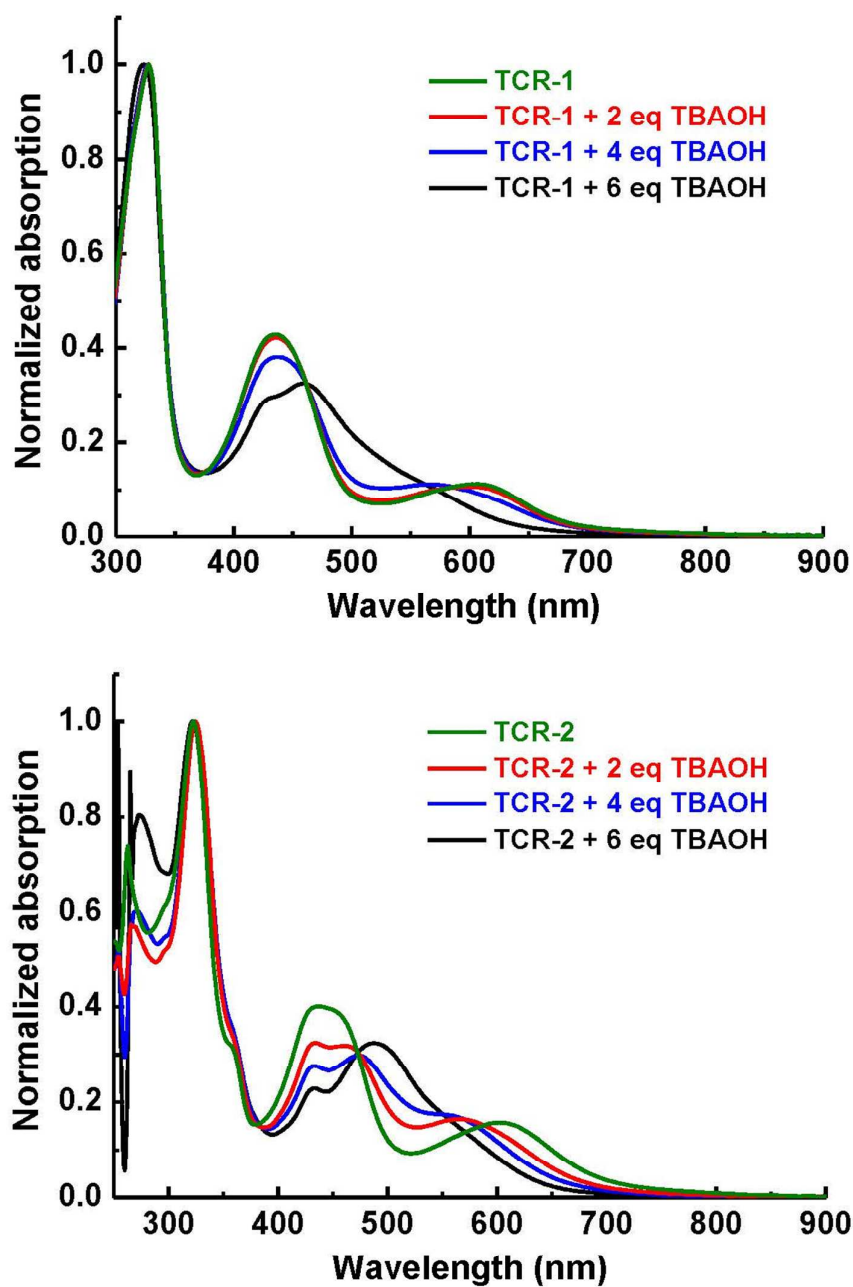

**Figure S6.** UV-Vis absorption spectra of Ru(II) sensitizers TCR-2 and TCR-2 at  $1.0 \times 10^{-4}$  M in DMF added with various amount of methanol solution containing TBAOH at  $1.0 \times 10^{-2}$  M.

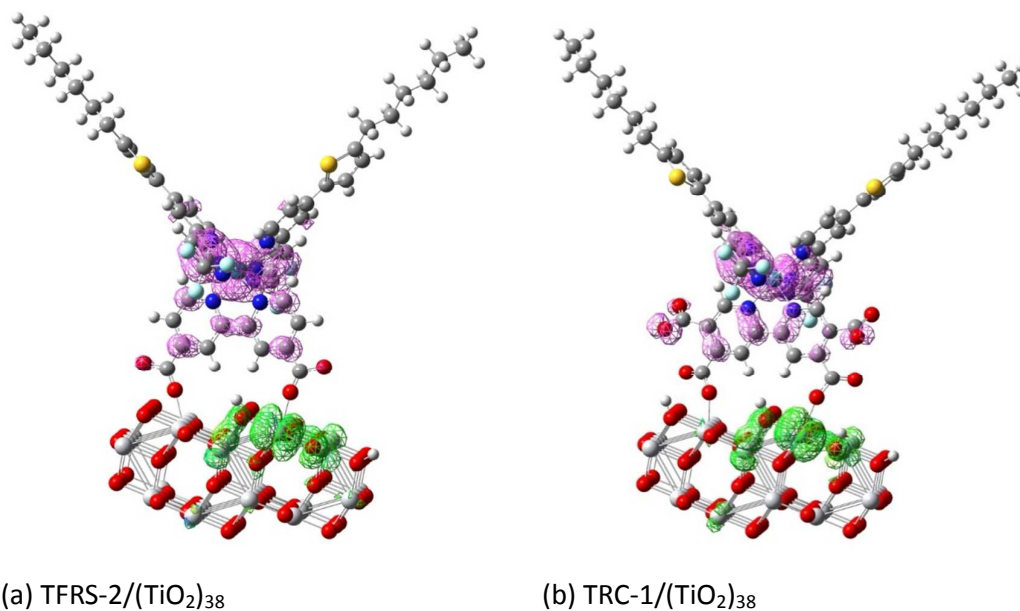

**Figure S7.** The frontier molecular orbitals HOMO (pink mesh) and LUMO (green mesh) of a) TFRS-2/ $(\text{TiO}_2)_{38}$  (left) and b) TCR-1/ $(\text{TiO}_2)_{38}$  (right).

## Reference

- S1. Frisch, M. J.; Trucks, G. W.; Schlegel, H. B.; Scuseria, G. E.; Robb, M. A.; Cheeseman, J. R.; Scalmani, G.; Barone, V.; Mennucci, B.; Petersson, G. A.; Nakatsuji, H.; Caricato, M.; Li, X.; Hratchian, H. P.; Izmaylov, A. F.; Bloino, J.; Zheng, G.; Sonnenberg, J. L.; Hada, M.; Ehara, M.; Toyota, K.; Fukuda, R.; Hasegawa, J.; Ishida, M.; Nakajima, T.; Honda, Y.; Kitao, O.; Nakai, H.; Vreven, T.; Montgomery, J. A.; Peralta, J. E.; Ogliaro, F.; Bearpark, M.; Heyd, J. J.; Brothers, E.; Kudin, K. N.; Staroverov, V. N.; Kobayashi, R.; Normand, J.; Raghavachari, K.; Rendell, A.; Burant, J. C.; Iyengar, S. S.; Tomasi, J.; Cossi, M.; Rega, N.; Millam, J. M.; Klene, M.; Knox, J. E.; Cross, J. B.; Bakken, V.; Adamo, C.; Jaramillo, J.; Gomperts, R.; Stratmann, R. E.; Yazyev, O.; Austin, A. J.; Cammi, R.; Pomelli, C.; Ochterski, J. W.; Martin, R. L.; Morokuma, K.; Zakrzewski, V. G.; Voth, G. A.; Salvador, P.; Dannenberg, J. J.; Dapprich, S.; Daniels, A. D.; Farkas; Foresman, J. B.; Ortiz, J. V.; Cioslowski, J.; Fox, D. J. *Gaussian 09, Revision A.1*; Gaussian Inc. **2009**, Wallingford, CT.
- S2. Liu, S.-H.; Fu, H.; Cheng, Y.-M.; Wu, K.-L.; Ho, S.-T.; Chi, Y.; Chou, P.-T. *J. Phys. Chem. C*, **2012**, *116*, 16338.
- S3. Pavlishchuk, V. V.; Addison, A. W. *Inorg. Chim. Acta*, **2000**, *298*, 97.
- S4. Duffy, N. W.; Peter, L. M.; Rajapakse, R. M. G.; Wijayantha, K. G. U. *Electrochem. Commun.*, **2000**, *2*, 658.
- S5. Bailes, M.; Cameron, P. J.; Lobato, K.; Peter, L. M. *J. Phys. Chem. B*, **2005**, *109*, 15429.
